# Supplementary material
Source: ML conference proceedings conference paper supplement (https://openaccess.thecvf.com/content/CVPR2021/html/Li_Lighting_Reflectance_and_CVPR_2021_paper.html)
Supplement: Supplementary file 2 [file Li_Lighting_Reflectance_and_CVPR_2021_supplemental.zip]

Archive with 3 entries (3 files):
- 02744-supp.pdf
- barbershop.mp4
- hall.mp4
